# Supplementary material
Source: publisher figshare collection journal article supplement (https://acs.figshare.com/ndownloader/files/29330541)
Supplement: Supplementary file [file 29330541]

## Supporting Information

# Graphene loading with polypyrrole nanoparticles for trace-level detection of ammonia at room temperature

*Juan Casanova-Chafer<sup>1\*</sup>, Polona Umek<sup>2</sup>, Selene Acosta<sup>3</sup>, Carla Bittencourt<sup>3</sup> and Eduard Llobet*

*<sup>1\*</sup>*

<sup>1</sup> Microsystems Nanotechnologies for Chemical Analysis (MINOS), Universitat Rovira i Virgili,  
43007 Tarragona, Spain

<sup>2</sup> Jožef Stefan Institute, 10000 Ljubljana, Slovenia

<sup>3</sup> Chimie des Interactions Plasma–Surface (ChIPS), Research Institute for Materials Science and  
Engineering, Université de Mons, 7000 Mons, Belgium

### AUTHOR INFORMATION

Corresponding authors

**Juan Casanova-Chafer** - Microsystems Nanotechnologies for Chemical Analysis (MINOS),

Universitat Rovira i Virgili, 43007, Tarragona, Spain. Email: [juan.casanova@urv.cat](mailto:juan.casanova@urv.cat)

**Eduard Llobet** - Microsystems Nanotechnologies for Chemical Analysis (MINOS), Universitat

Rovira i Virgili, 43007, Tarragona, Spain. Email: [eduard.llobet@urv.cat](mailto:eduard.llobet@urv.cat)

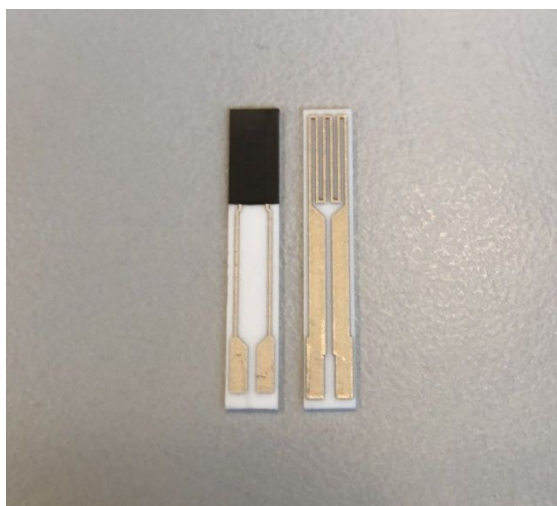

**Figure S1.** Layer of graphene nanoflakes loaded with PPy NPs onto alumina substrate.

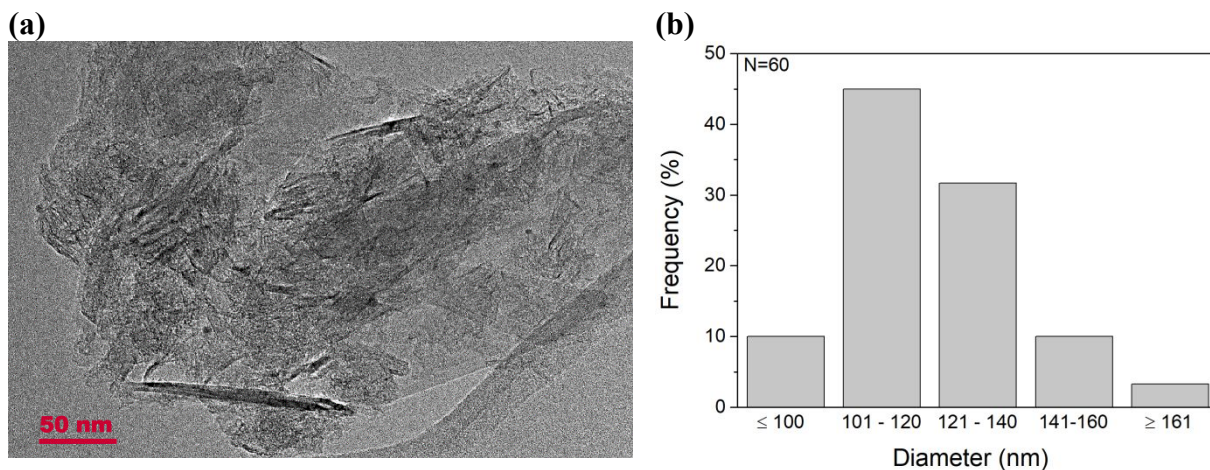

**Figure S2.** (a) HRTEM image at a lower magnification of the bare graphene. (b) PPy nanoparticle size distribution histogram. Above 75% of PPy NPs have diameter in the range of 101 to 140 nm.

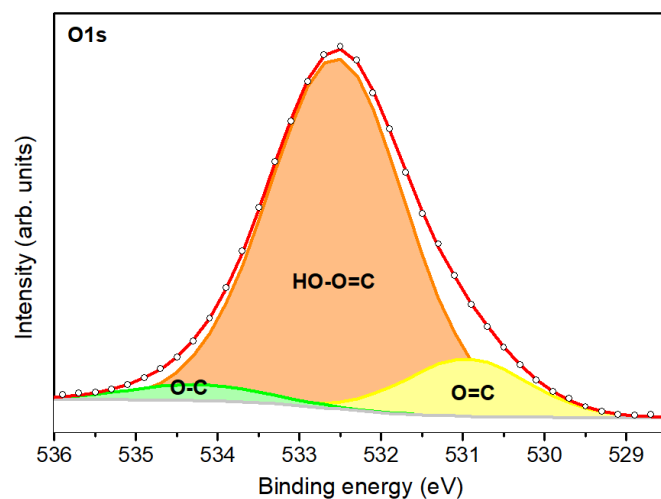

**Figure S3.** XPS O1s core level obtained for the bare PPy NPs.

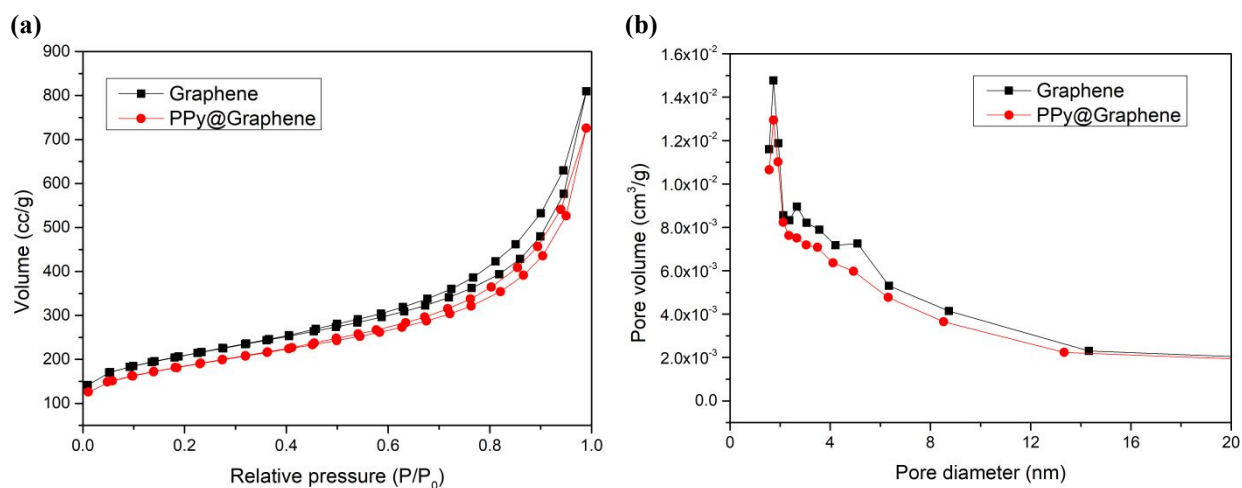

**Figure S4.** Adsorption-desorption isotherms for both samples (a). Pore diameter distribution for bare and PPy decorated graphene (b).

**Table S1.** Comparison of characterization results.

| Sample       | BET area (m <sup>2</sup> /g) | Average pore diameter (nm) | Pore volume (cm <sup>3</sup> /g) |
|--------------|------------------------------|----------------------------|----------------------------------|
| Graphene     | 730                          | 1.730                      | 1.037                            |
| PPy@Graphene | 644                          | 1.735                      | 0.993                            |

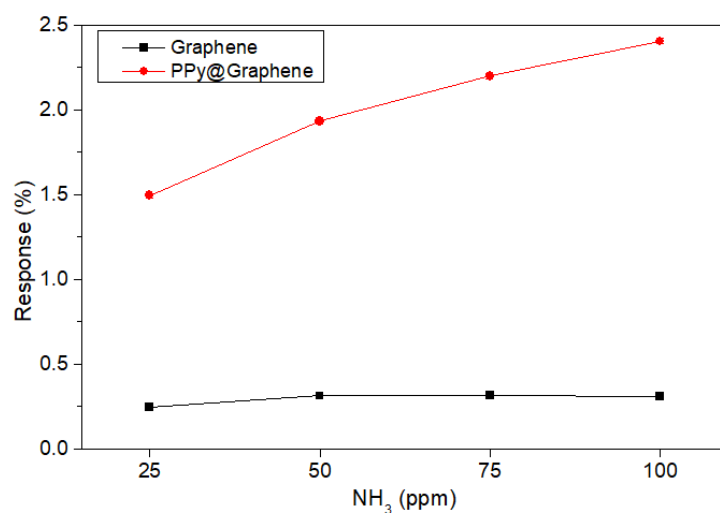

**Figure S5.** Calibration curves obtained for the detection of NH<sub>3</sub> (concentration range: 25-100 ppm).

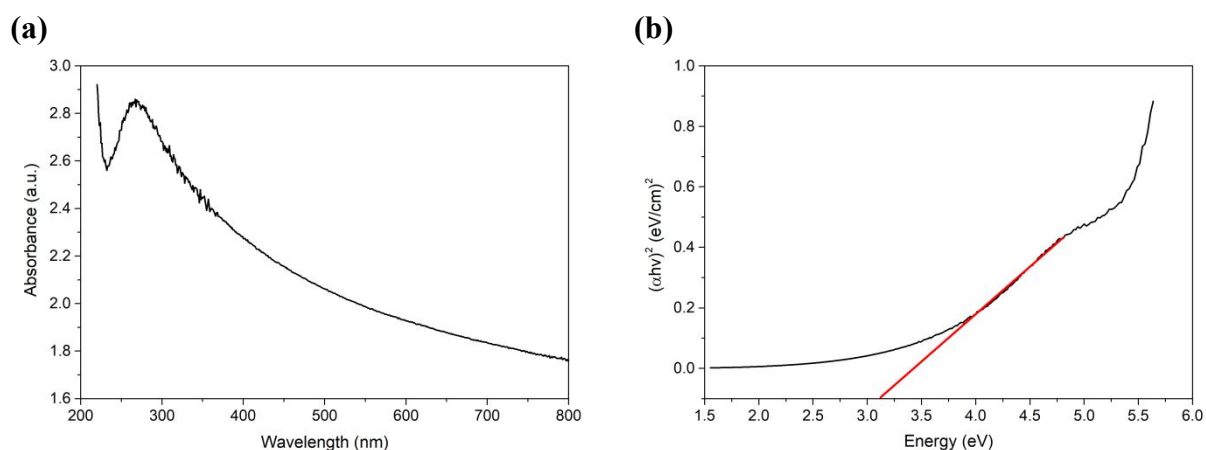

**Figure S6.** UV-Vis absorption spectrum for graphene nanoflakes **(a)** and Tauc plot for calculating their direct bandgap **(b)**. Sample preparation comprised 5 mg of graphene added to 2 ml of ethanol in a 10 x 10 mm fluorescence quartz cuvette. Afterwards, the cuvette was sealed and subsequently deaerated by purging with an Ar gas stream for 10 minutes.

**(a)**

**(b)**

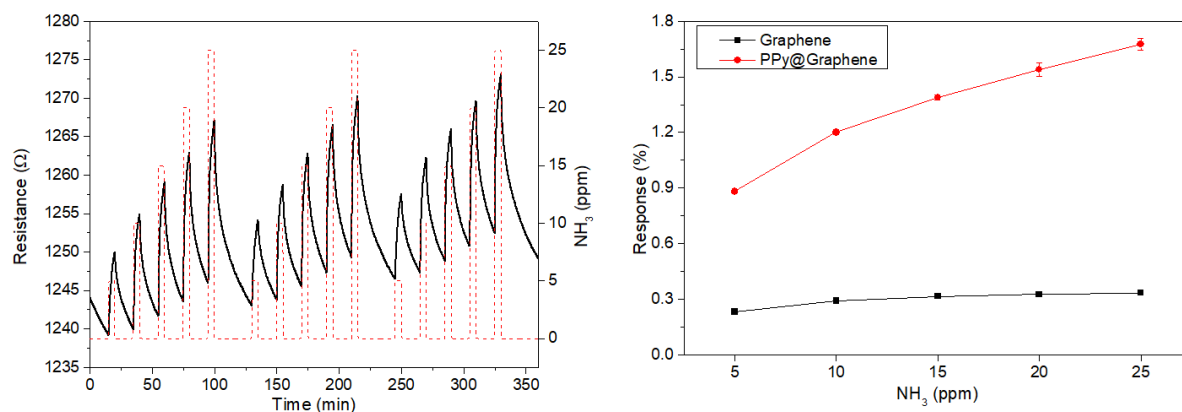

**Figure S7.** Example of electrical responses when detecting NH<sub>3</sub> at the concentration range of 5-25 ppm for the PPy@Graphene sensor (a). Comparison of the calibration curves obtained for bare and PPy loaded graphene (b). Higher responses and sensitivity can be observed for the PPy@Graphene sample.

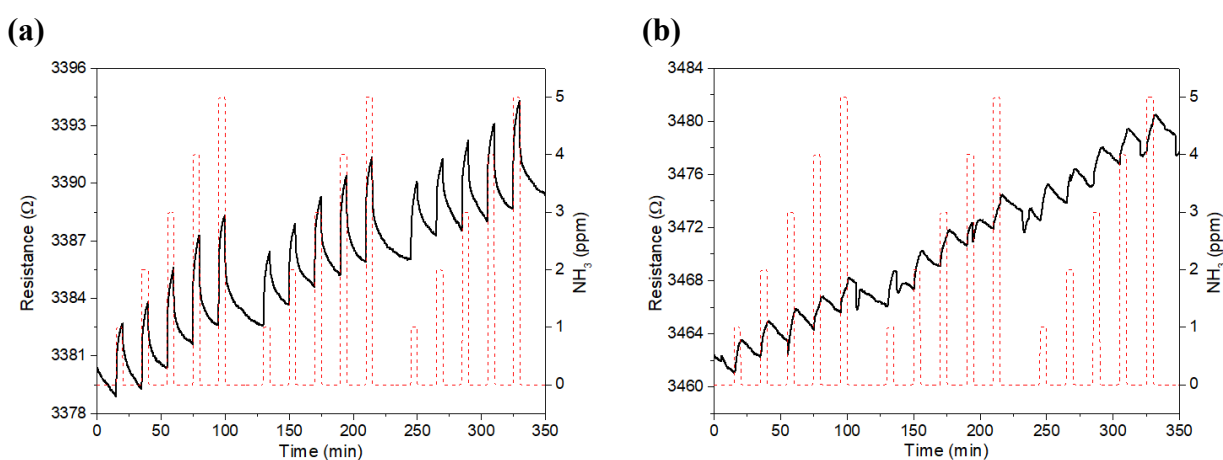

**Figure S8.** Examples of electrical responses when detecting low concentrations of NH<sub>3</sub> for the bare graphene sensor in dry (a) and humid (b) conditions.

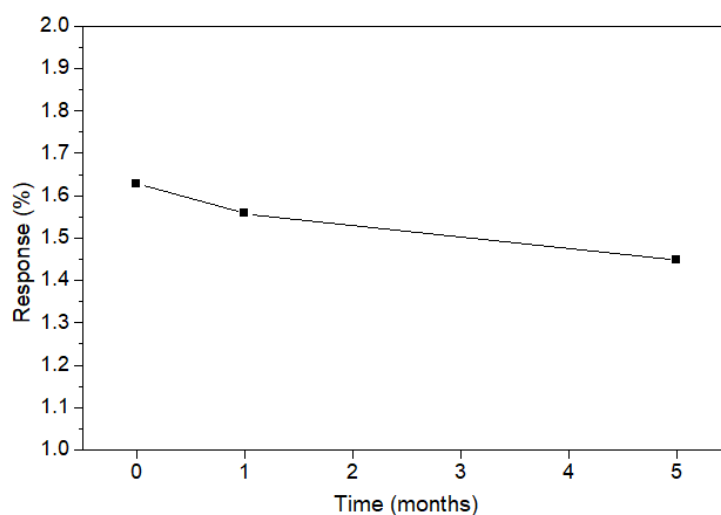

**Figure S9.** Stability study of the PPy@Graphene sensor, 50 ppm of NH<sub>3</sub> were measured over a 5-month period. A slightly higher slope during the first month can be observed. Nonetheless, during the following months, the slope was lowered, revealing a high sensor stability in the long term.

**Table S2.** Relative area (%A) of the different components obtained from the C 1s core level peak. The comparison was done with the freshly synthesized sample before the gas sensing measurements and after 5-months of use for detecting NH<sub>3</sub>.

| Component       | %A Before | %A After |
|-----------------|-----------|----------|
| sp <sup>2</sup> | 45.1      | 42.4     |
| sp <sup>3</sup> | 34.9      | 36.9     |
| C-O/C-N         | 11.4      | 11.7     |
| C=O/C=N         | 5.8       | 6.5      |
| O-C=O/N-C=O     | 2.8       | 2.5      |

**Table S3.** Relative area (%A) of the different components obtained from the N 1s core level peak. The comparison was done with the freshly synthesized sample before the gas sensing measurements and after 5-months of use for detecting NH<sub>3</sub>.

| Component        | %A Before | %A After |
|------------------|-----------|----------|
| NH               | 54        | 40       |
| C=N              | 9         | 27       |
| C-N <sup>+</sup> | 32.1      | 12.3     |
| C=N <sup>+</sup> | 4.9       | 12.1     |
| Amines           | -         | 7.7      |

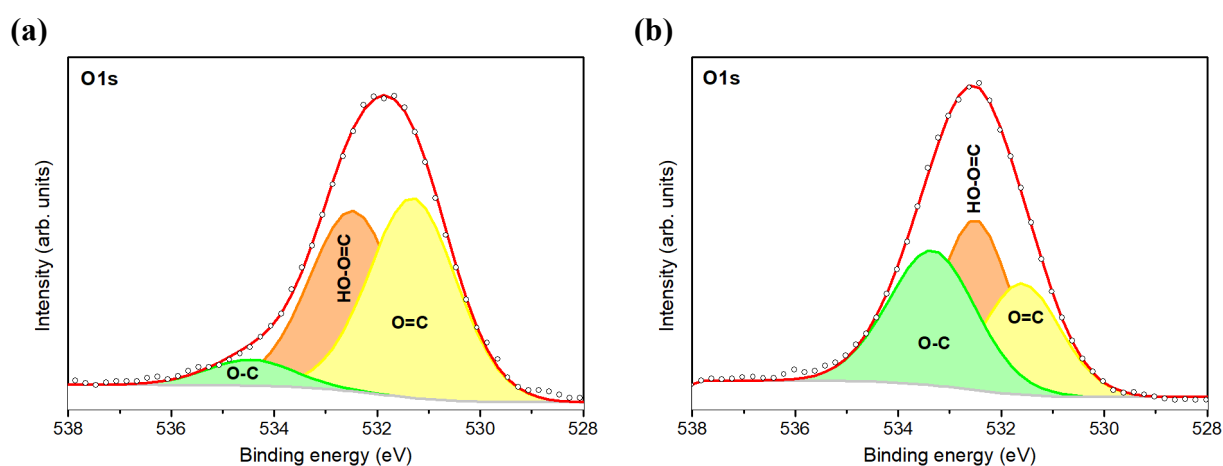

**Figure S10.** XPS O 1s core level obtained for the sample PPy@Graphene before (a) and after (b) NH<sub>3</sub> gas sensing.

**Table S4.** Comparison of the NH<sub>3</sub> sensing performance for polypyrrole (PPy)/graphene hybrids operated at room temperature. Sensitivity coefficients calculated as the response (%) / concentration applied. LOD: limit of detection. NA: not available data. *Color code:* Green and Red are for positive and negative features, respectively. Orange is not positive nor negative.

| Nanomaterial                     | Polymerization procedure | Ease of synthesis | Solvent-free | Sensitivity Coefficient | Flow rate (sccm) | Carrier gas        | LOD (ppb) | Stability test | Moisture cross-sensitivity test | Repeatability test | Reference |
|----------------------------------|--------------------------|-------------------|--------------|-------------------------|------------------|--------------------|-----------|----------------|---------------------------------|--------------------|-----------|
| PPy NPs – Graphene               | Chemical                 | Yes               | Yes          | 0.88                    | 100              | Air                | 419       | Yes            | Yes                             | Yes                | This work |
| PPy - GO                         | Chemical                 | Yes               | No           | 0.029                   | NA               | Air                | NA        | No             | No                              | No                 | [1]       |
| Thin PPy layer - Graphene        | Electrochemical          | No                | No           | 1.7                     | 1000             | Air                | NA        | Yes            | Yes                             | Yes                | [2]       |
| PPy – Single Layer Graphene      | Electrochemical          | No                | No           | 7.5                     | NA               | Air                | 0.04      | No             | No                              | Yes                | [3]       |
| PPy - rGO                        | Chemical                 | Yes               | Yes          | 0.37                    | NA               | Air/N <sub>2</sub> | NA        | No             | No                              | No                 | [4]       |
| TiO <sub>2</sub> NPs – Ppy - rGO | Chemical                 | Yes               | No           | 2.04                    | NA               | N <sub>2</sub>     | 1000      | Yes            | Yes                             | Yes                | [5]       |
| PPy film - GO                    | Electrochemical          | Yes               | No           | 0.1                     | 1000             | N <sub>2</sub>     | NA        | No             | No                              | No                 | [6]       |

## References

- [1] Patil, P., Gaikwad, G., Patil, D. R., Naik, J., Gas Sensitivity Study of Polypyrrole Decorated Graphene Oxide Thick Film. *J. Inst. Eng. Ser. D* 2016, 97, 47–53.
- [2] Tang, X., Lahem, D., Raskin, J. P., Gérard, P., Geng, X., André, N., Debligny, M., A Fast and Room-Temperature Operation Ammonia Sensor Based on Compound of Graphene with Polypyrrole. *IEEE Sens. J.* 2018, 18, 9088–9096.
- [3] Yoon, T., Jun, J., Kim, D. Y., Pourasad, S., Shin, T. J., Yu, S. U., Na, W., Jang, J., Kim, K. S., An ultra-sensitive, flexible and transparent gas detection film based on well-ordered flat polypyrrole on single-layered graphene. *J. Mater. Chem. A* 2018, 6, 2257–2263.
- [4] Tiwari, D. C., Atri, P., Sharma, R., Sensitive detection of ammonia by reduced graphene oxide/polypyrrole nanocomposites. *Synth. Met.* 2015, 203, 228–234.
- [5] Xiang, C., Jiang, D., Zou, Y., Chu, H., Qiu, S., Zhang, H., Xu, F., Sun, L., Zheng, L., Ammonia sensor based on polypyrrole-graphene nanocomposite decorated with titania nanoparticles. *Ceram. Int.* 2015, 41, 6432–6438.
- [6] Zhang, L., Li, C., Liu, A., Shi, G., Electrosynthesis of graphene oxide/polypyrrole composite films and their applications for sensing organic vapors. *J. Mater. Chem.* 2012, 22, 8438–8443.
